# Supplementary material for: Total synthesis of (±)-auranthine confirmed its refined structure
Source: Royal Society of Chemistry journal article supplement (doi:10.1039/d3ra07483h), 2024-01-01

## Supporting Information

# Total Synthesis of (±)-Auranthine Confirmed its Refined Structure

*Marie Reinker,<sup>1</sup> Svetlana A. Kalinina<sup>2,\*</sup> Dmitrii V. Kalinin<sup>1,\*</sup>*

<sup>1</sup>Institute of Pharmaceutical and Medicinal Chemistry, University of Münster, Corrensstraße 48,  
48149, Münster, Germany

<sup>2</sup>Institute of Food Chemistry, University of Münster, Corrensstraße 45, 48149 Münster, Germany

\*To whom correspondence should be addressed:

Tel.: +49-251-8333372; E-mail: [dmitrii.kalinin@uni-muenster.de](mailto:dmitrii.kalinin@uni-muenster.de) (D.V.K.);

Tel.: +49-251-8333392; E-mail: [s\\_kali03@uni-muenster.de](mailto:s_kali03@uni-muenster.de) (S.A.K.).

## Table of contents

|                                                                                                                |            |
|----------------------------------------------------------------------------------------------------------------|------------|
| <sup>1</sup> H NMR spectrum of <b>10</b> .....                                                                 | <b>S3</b>  |
| <sup>13</sup> C NMR spectrum of <b>10</b> .....                                                                | <b>S3</b>  |
| <sup>1</sup> H NMR spectrum of <b>14</b> .....                                                                 | <b>S4</b>  |
| <sup>13</sup> C NMR spectrum of <b>14</b> .....                                                                | <b>S4</b>  |
| <sup>1</sup> H NMR spectrum of <b>15</b> .....                                                                 | <b>S5</b>  |
| <sup>13</sup> C NMR spectrum of <b>15</b> .....                                                                | <b>S5</b>  |
| <sup>1</sup> H NMR spectrum of <b>11</b> .....                                                                 | <b>S6</b>  |
| <sup>13</sup> C NMR spectrum of <b>11</b> .....                                                                | <b>S6</b>  |
| <sup>1</sup> H NMR spectrum of <b>12</b> .....                                                                 | <b>S7</b>  |
| <sup>13</sup> C NMR spectrum of <b>12</b> .....                                                                | <b>S7</b>  |
| <sup>1</sup> H NMR spectrum of <b>16</b> .....                                                                 | <b>S8</b>  |
| <sup>13</sup> C NMR spectrum of <b>16</b> .....                                                                | <b>S8</b>  |
| <sup>1</sup> H NMR spectrum of <b>13'</b> .....                                                                | <b>S9</b>  |
| <sup>13</sup> C NMR spectrum of <b>13'</b> .....                                                               | <b>S9</b>  |
| <sup>1</sup> H NMR spectrum of <b>5</b> .....                                                                  | <b>S10</b> |
| <sup>13</sup> C NMR spectrum of <b>5</b> .....                                                                 | <b>S10</b> |
| <sup>1</sup> H NMR spectrum of (±)-Auranthine ( <b>1</b> ).....                                                | <b>S11</b> |
| <sup>13</sup> C NMR spectrum of (±)-Auranthine ( <b>1</b> ).....                                               | <b>S11</b> |
| IR spectra comparison of synthetic (±)-Auranthine ( <b>1</b> )<br>and natural (-)-Auranthine ( <b>1</b> )..... | <b>S12</b> |

## 2-(2-Aminobenzamido)benzoic acid (10)

$^1\text{H}$  NMR (600 MHz, DMSO- $d_6$ )

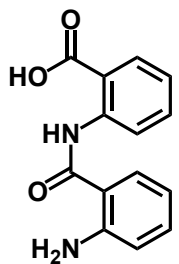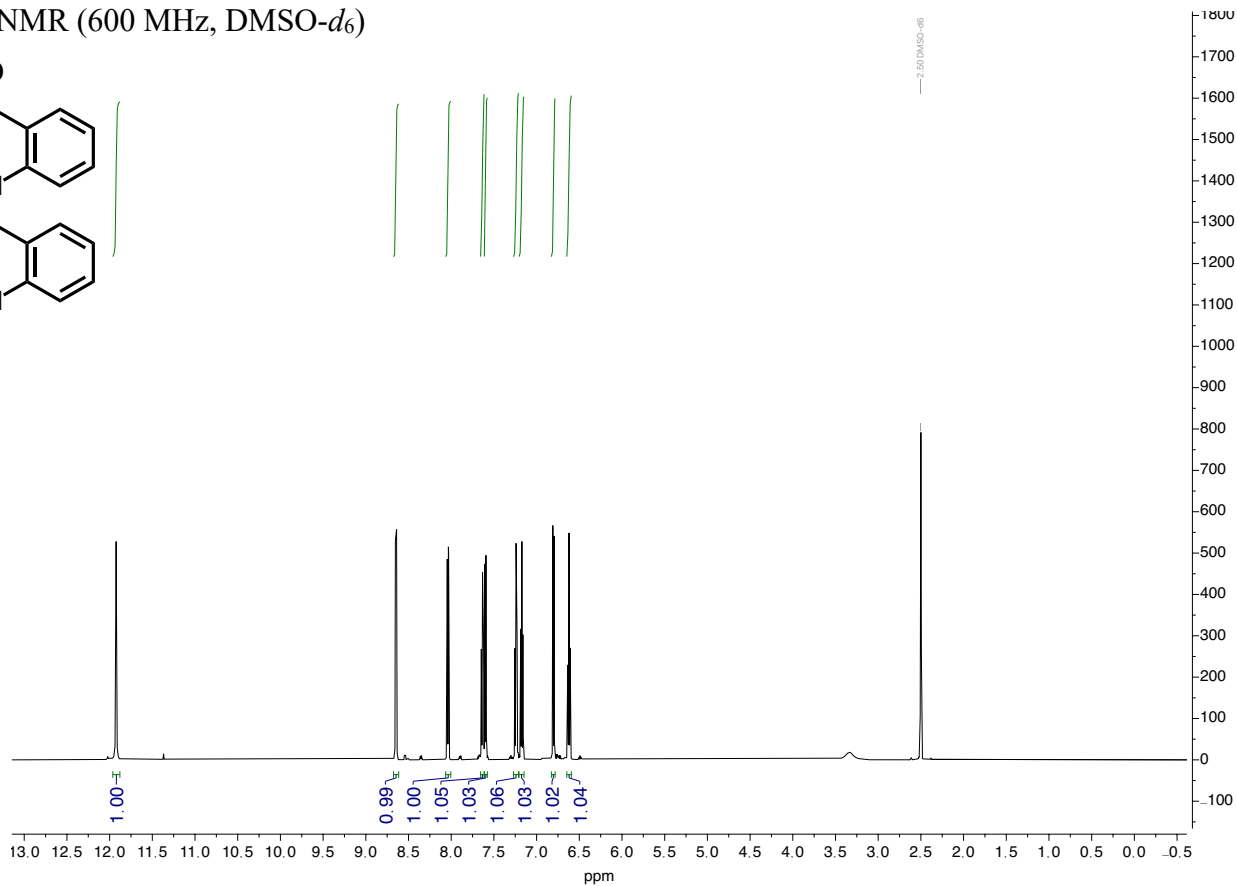

$^{13}\text{C}$  NMR (151 MHz, DMSO- $d_6$ )

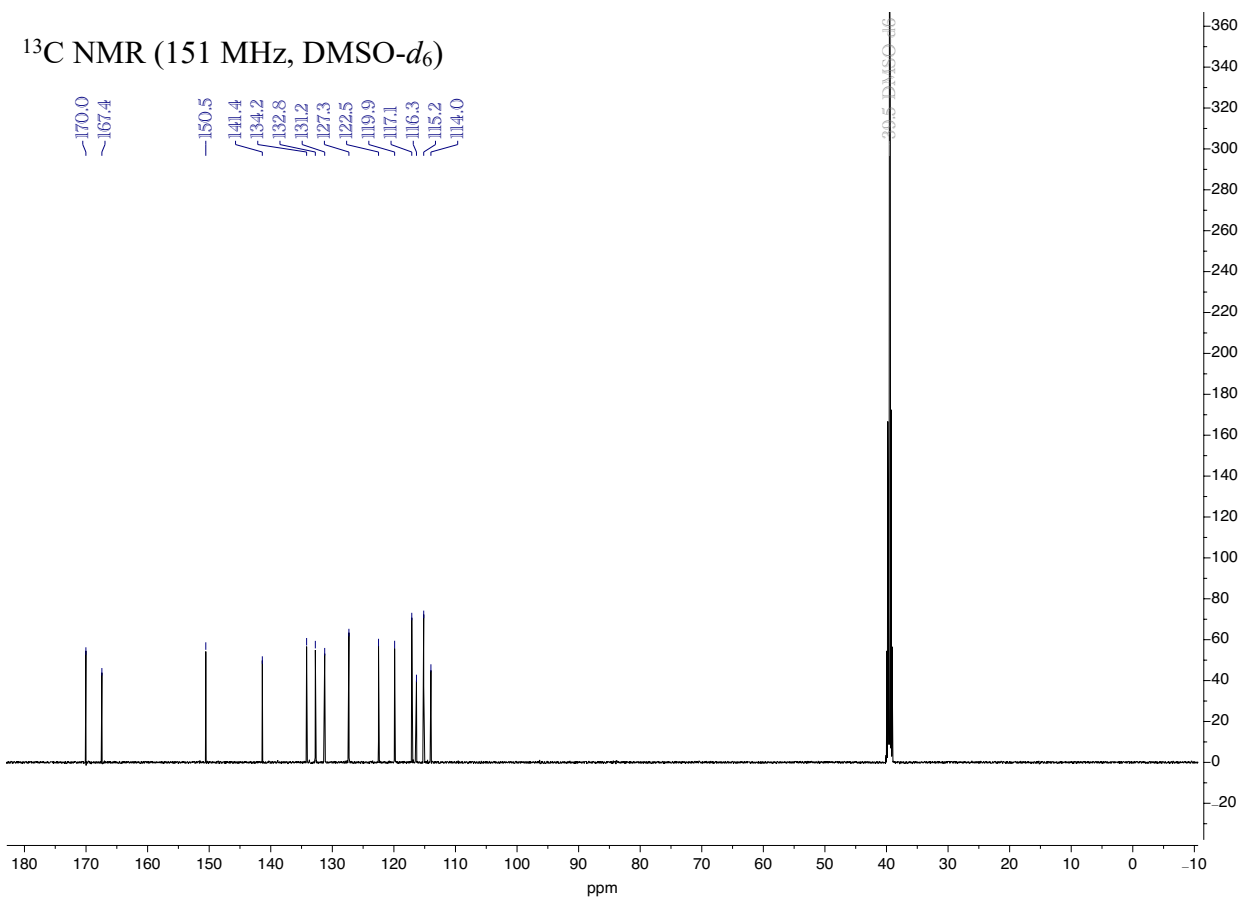

# Methyl 2-(2-aminobenzoylamino)benzoate (14)

$^1\text{H}$  NMR (400 MHz,  $\text{DMSO-}d_6$ )

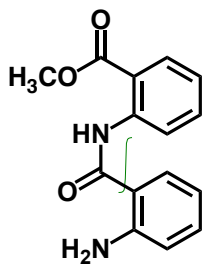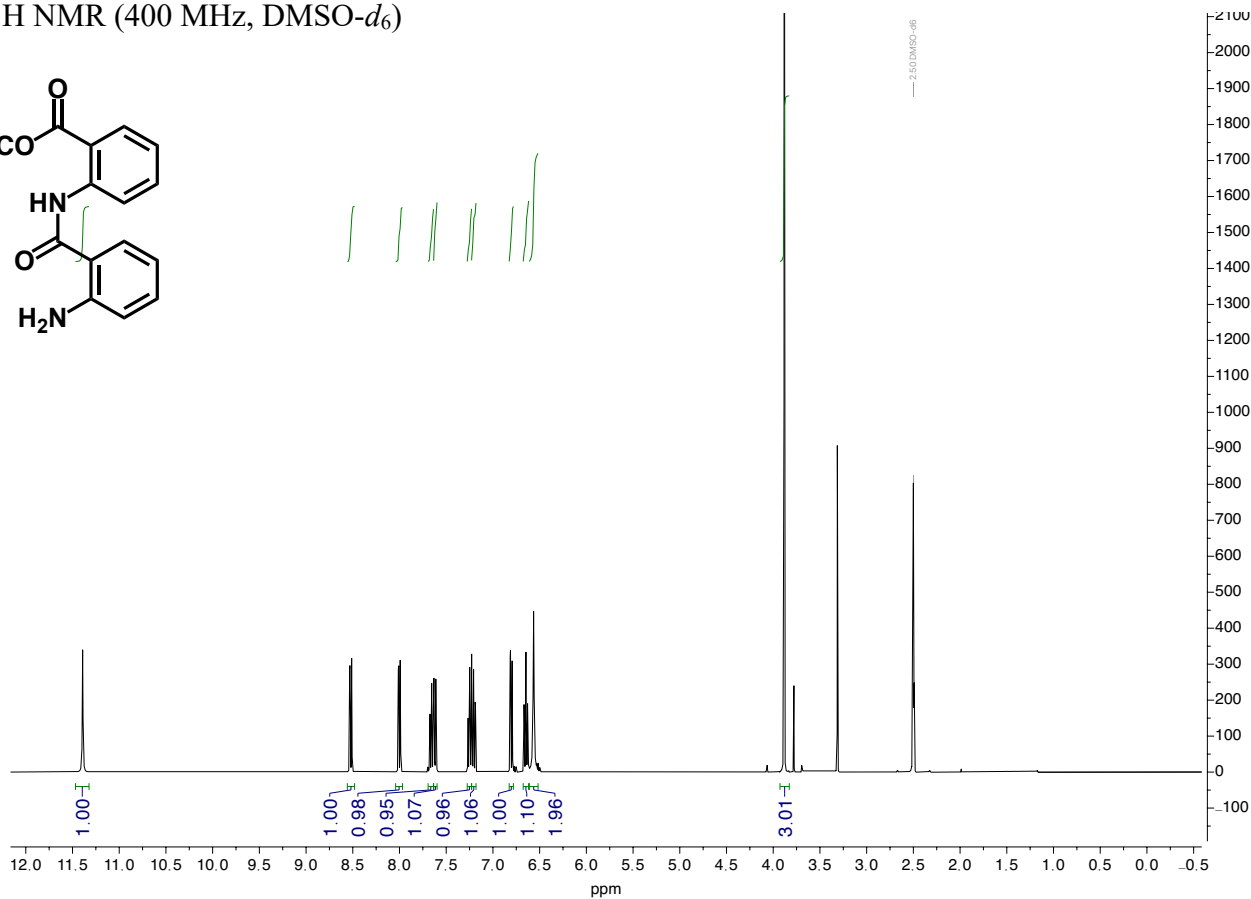

$^{13}\text{C}$  NMR (101 MHz,  $\text{DMSO-}d_6$ )

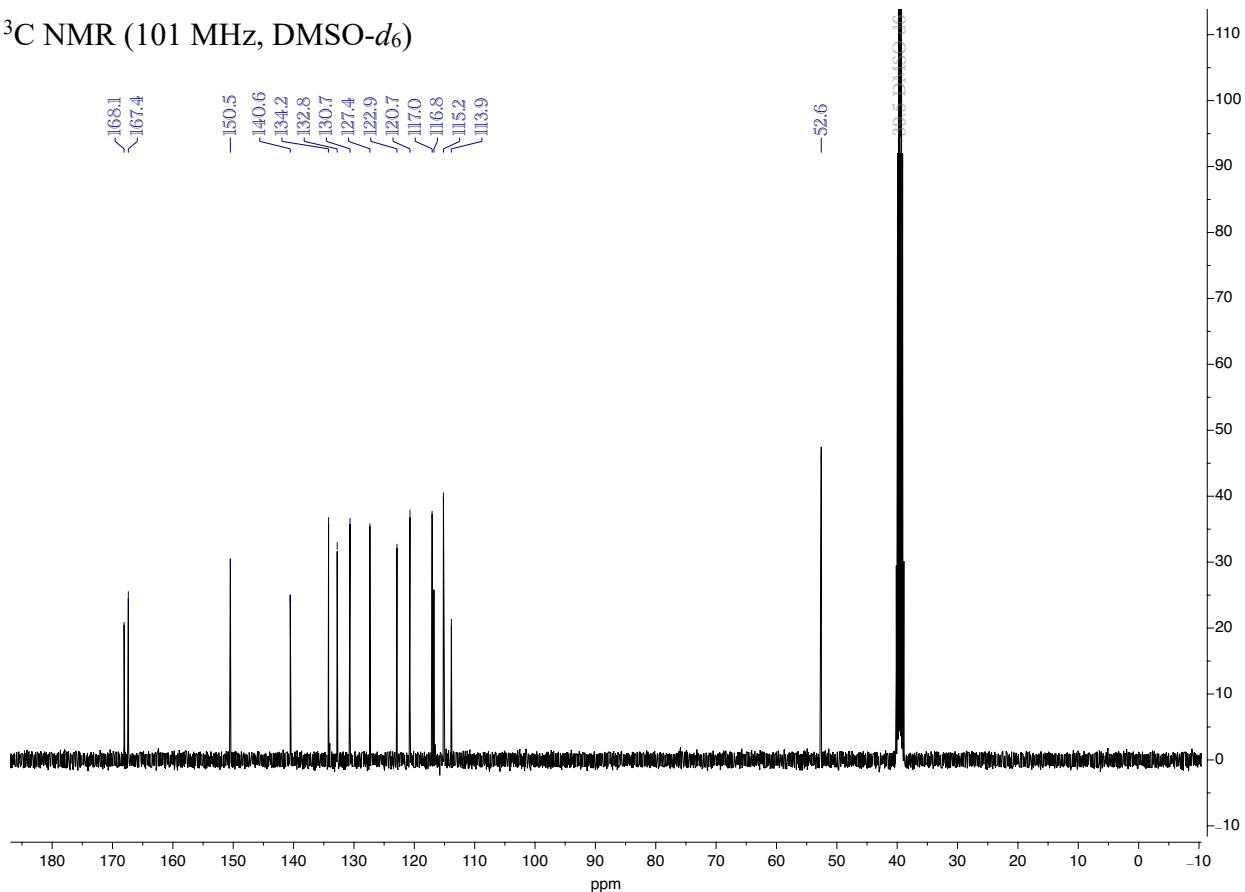

**Methyl (S)-2-(2-(5-amino-2-(((benzyloxy)carbonyl)amino)-5-oxopentanamido)benzamido)benzoate (15)**

<sup>1</sup>H NMR (600 MHz, DMSO-d<sub>6</sub>)

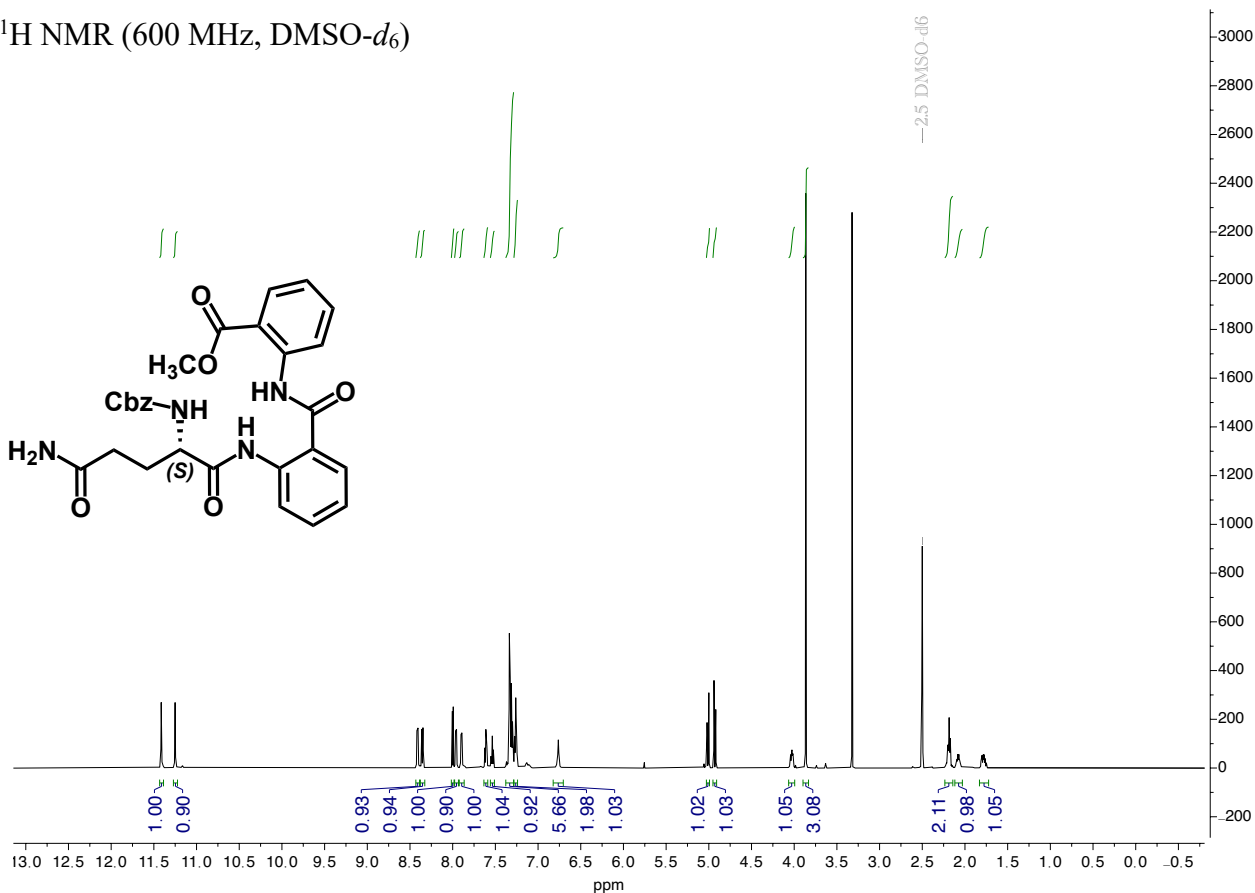

<sup>13</sup>C NMR (151 MHz, DMSO-d<sub>6</sub>)

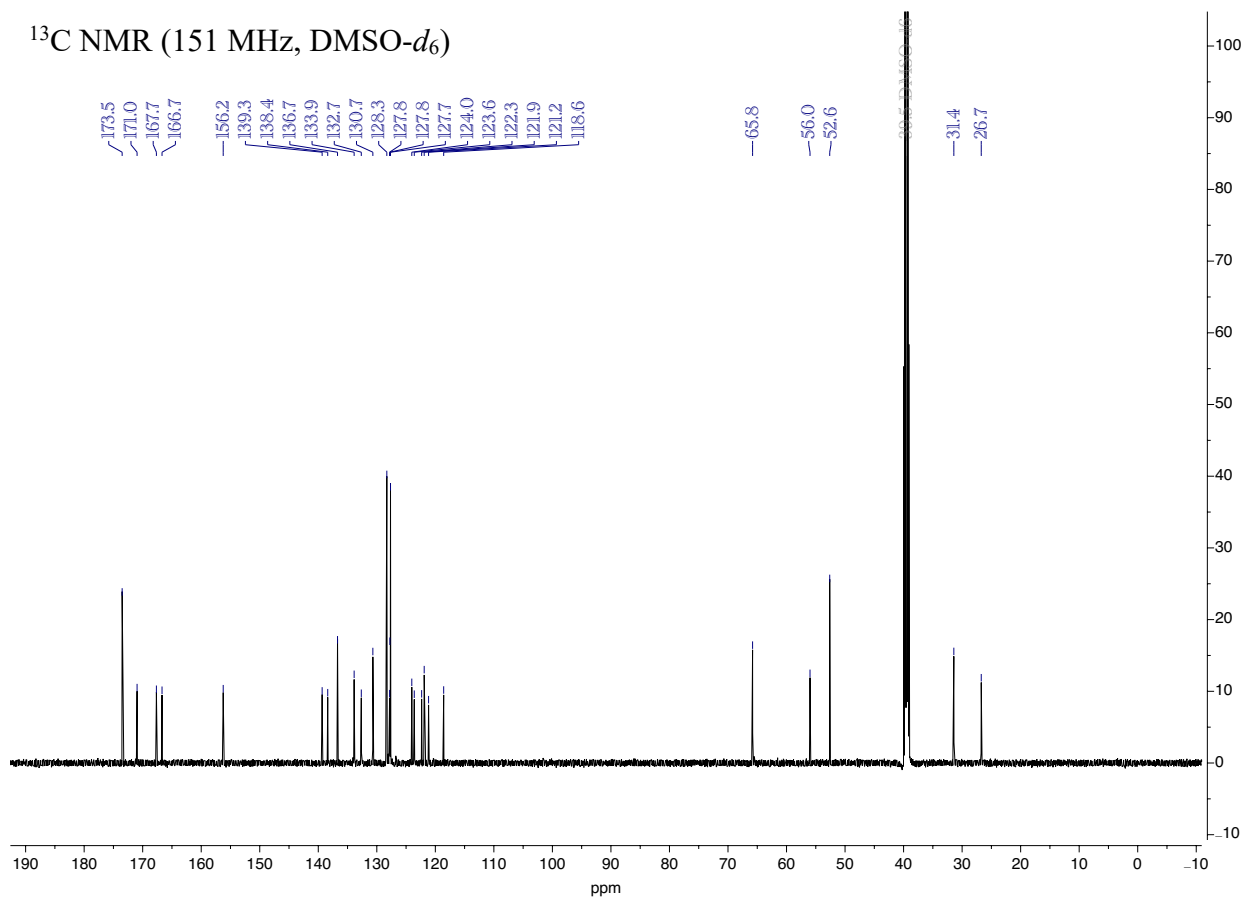

# Methyl (S)-2-(2-(2,5-diamino-5-oxopentanamido)benzamido)benzoate (11)

$^1\text{H}$  NMR (600 MHz,  $\text{DMSO-}d_6$ )

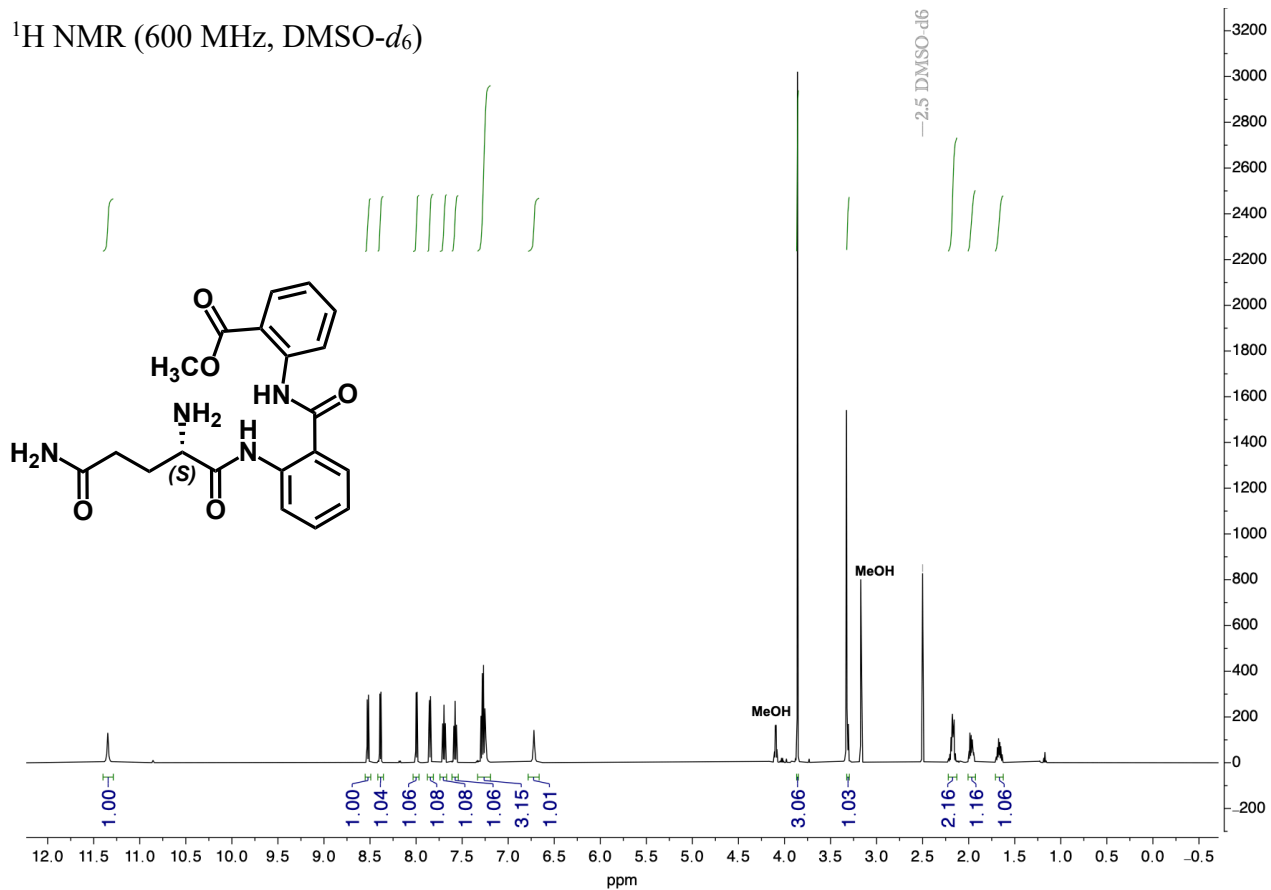

$^{13}\text{C}$  NMR (151 MHz,  $\text{DMSO-}d_6$ )

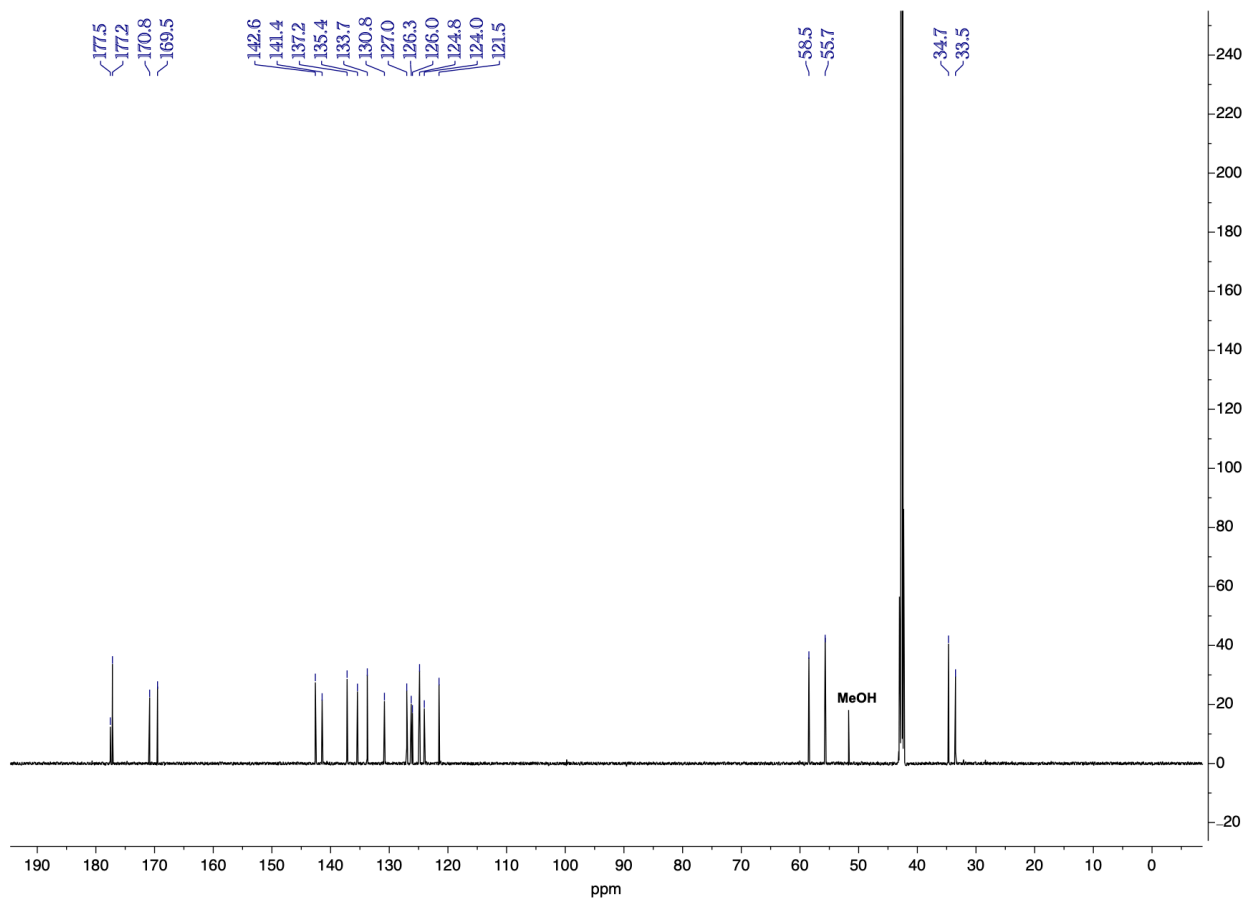

# Methyl (S)-3-(2,5-Dioxo-2,3,4,5-tetrahydro-1H-1,4-benzodiazepin-3-yl) propanoate (12)

$^1\text{H}$  NMR (400 MHz,  $\text{DMSO-}d_6$ )

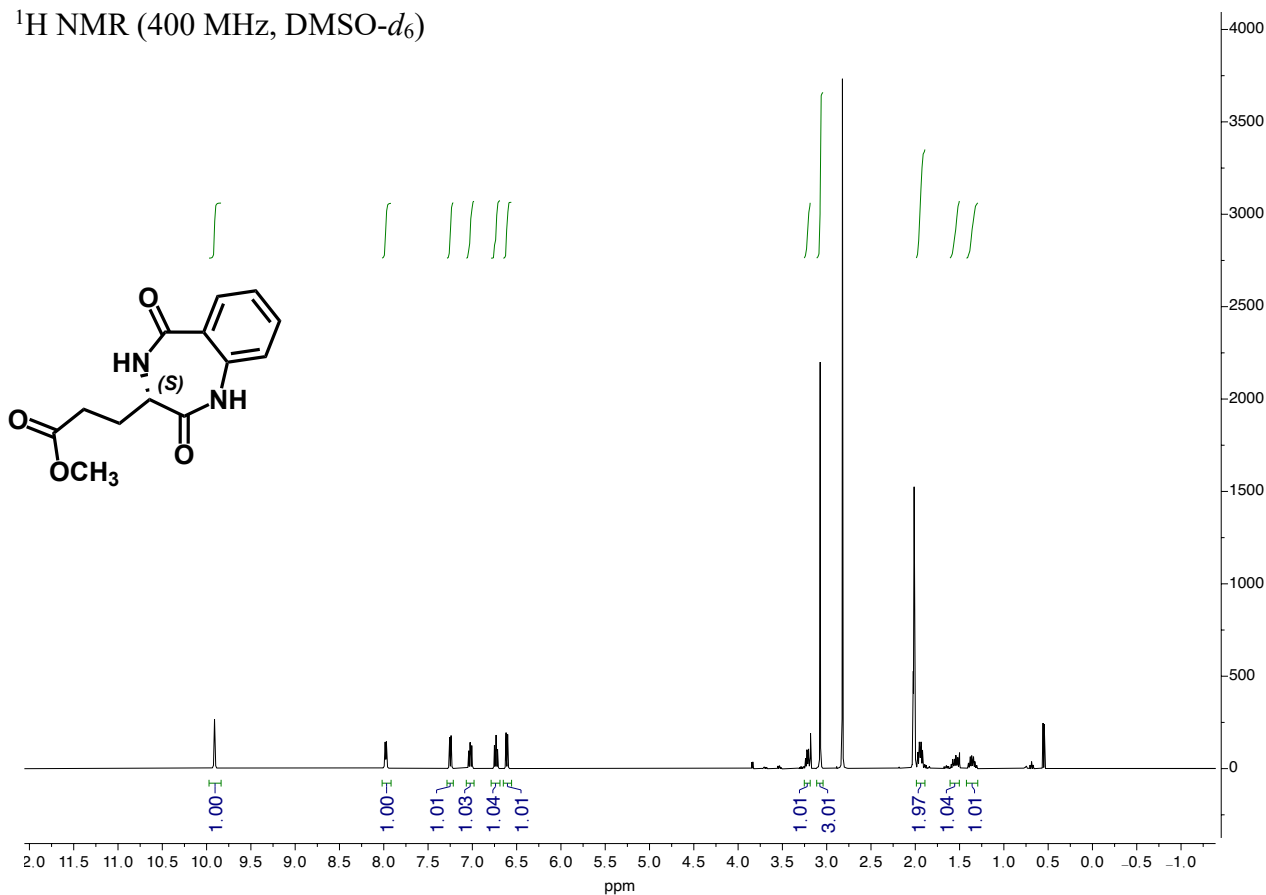

$^{13}\text{C}$  NMR (101 MHz,  $\text{DMSO-}d_6$ )

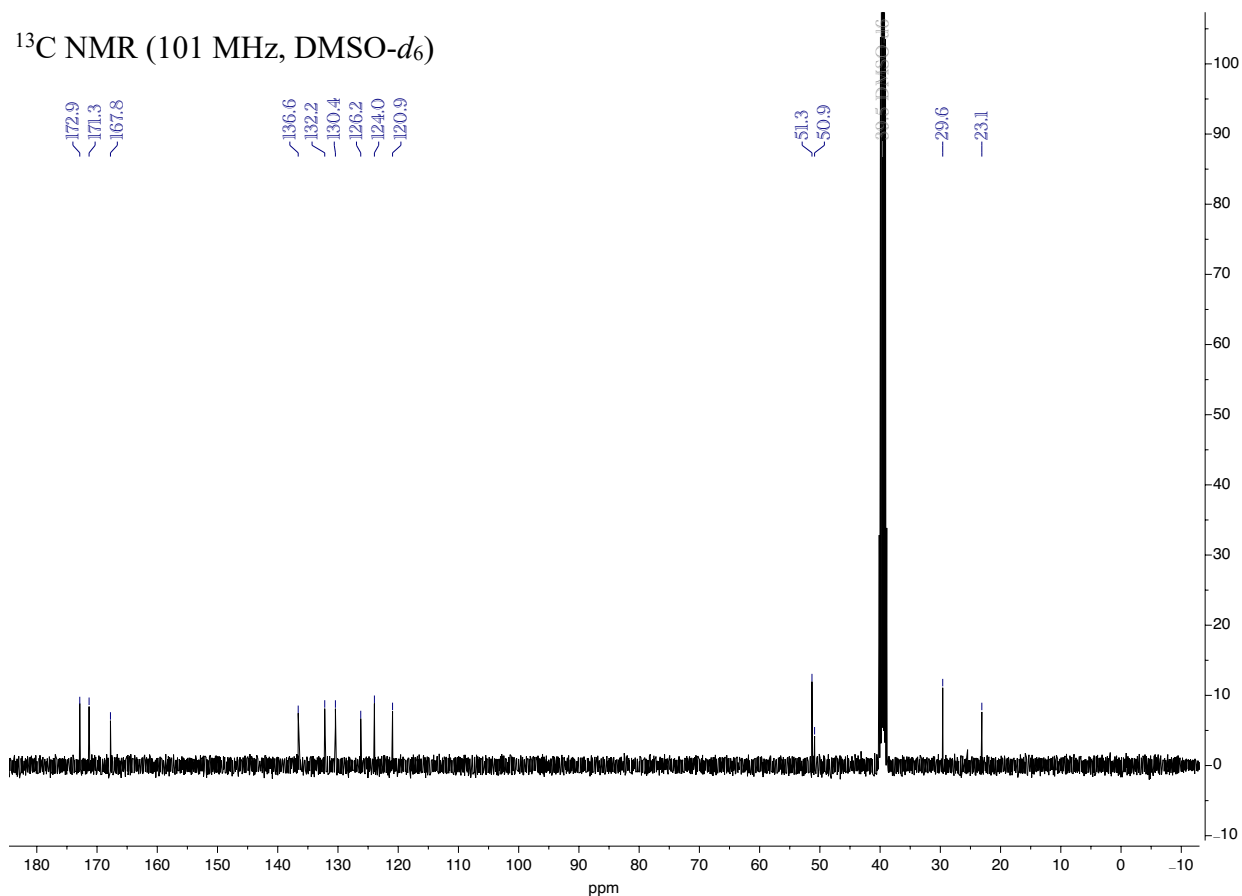

**(±)-1,11a-Dihydro-3H-benzo[e]pyrrolo[1,2-a][1,4]diazepine-3,5,11(2H,10H)-trione (16)**

<sup>1</sup>H NMR (600 MHz, DMSO-*d*<sub>6</sub>)

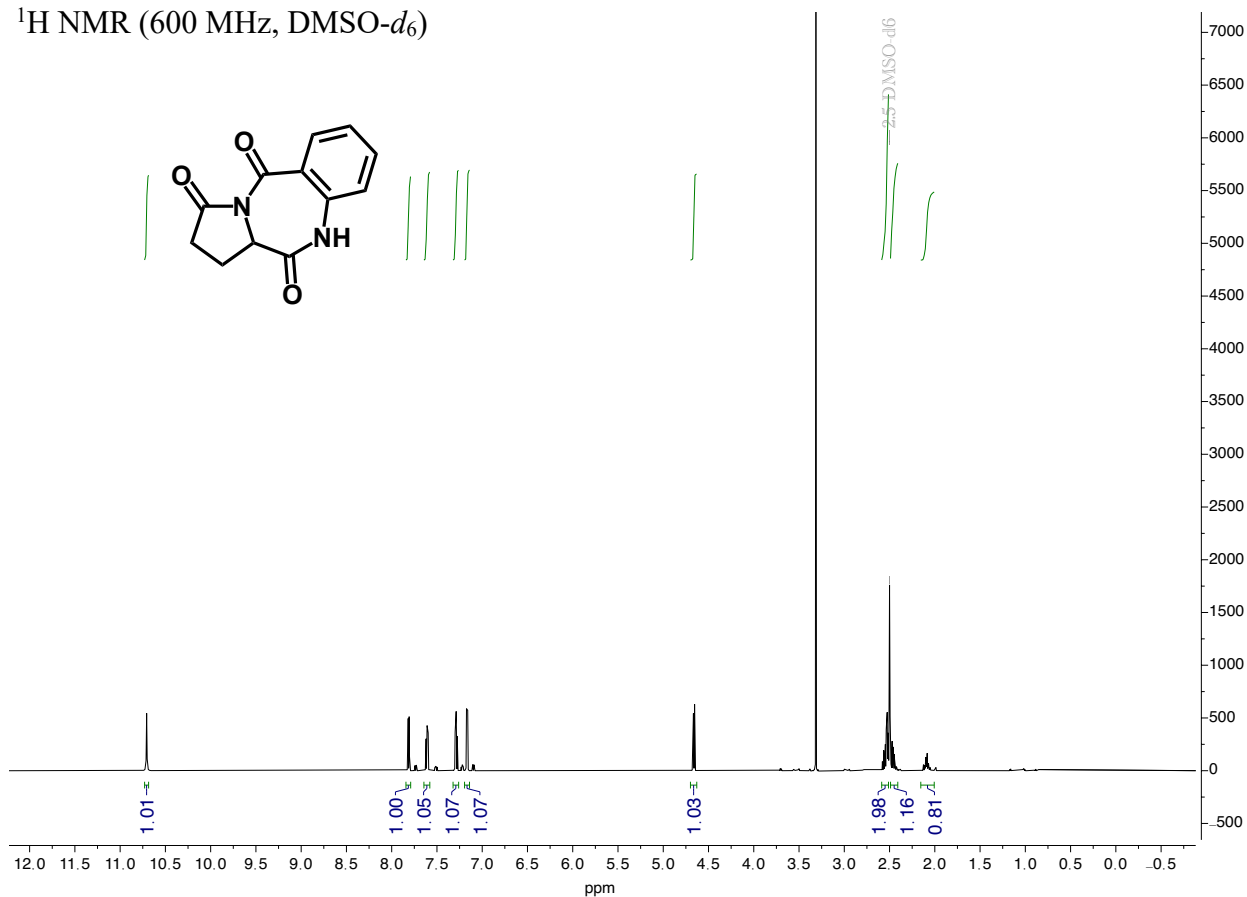

<sup>13</sup>C NMR (151 MHz, DMSO-*d*<sub>6</sub>)

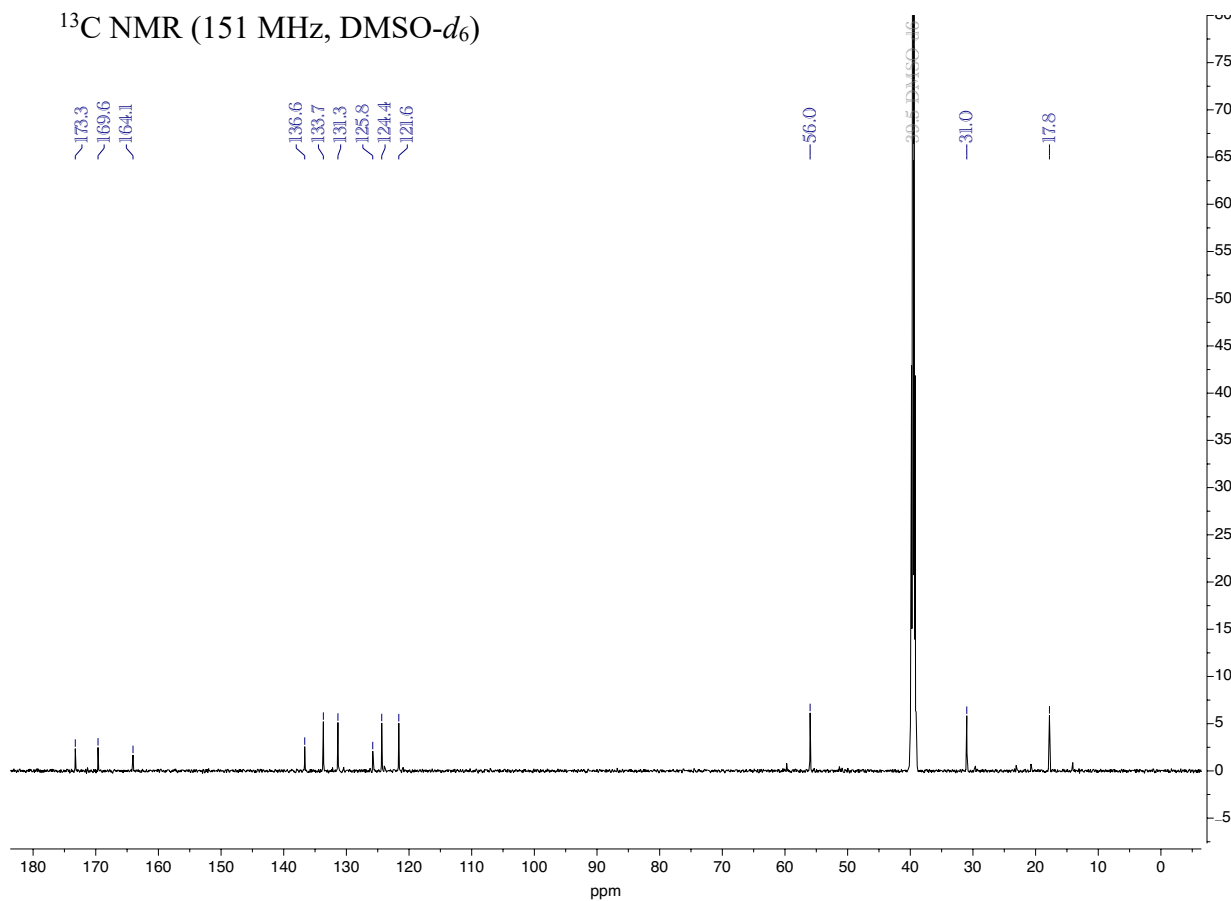



**(±)-6,7-Dihydro-8*H*,10*H*-benzo[6,7]pyrrolo[2',1':3,4][1,4]diazepino[2,1-*b*]quinazoline-8,10,16(5*bH*)-trione (13')**

<sup>1</sup>H NMR (600 MHz, DMSO-*d*<sub>6</sub>)

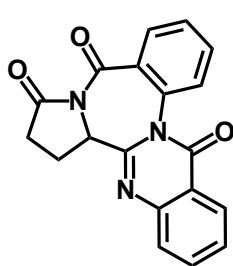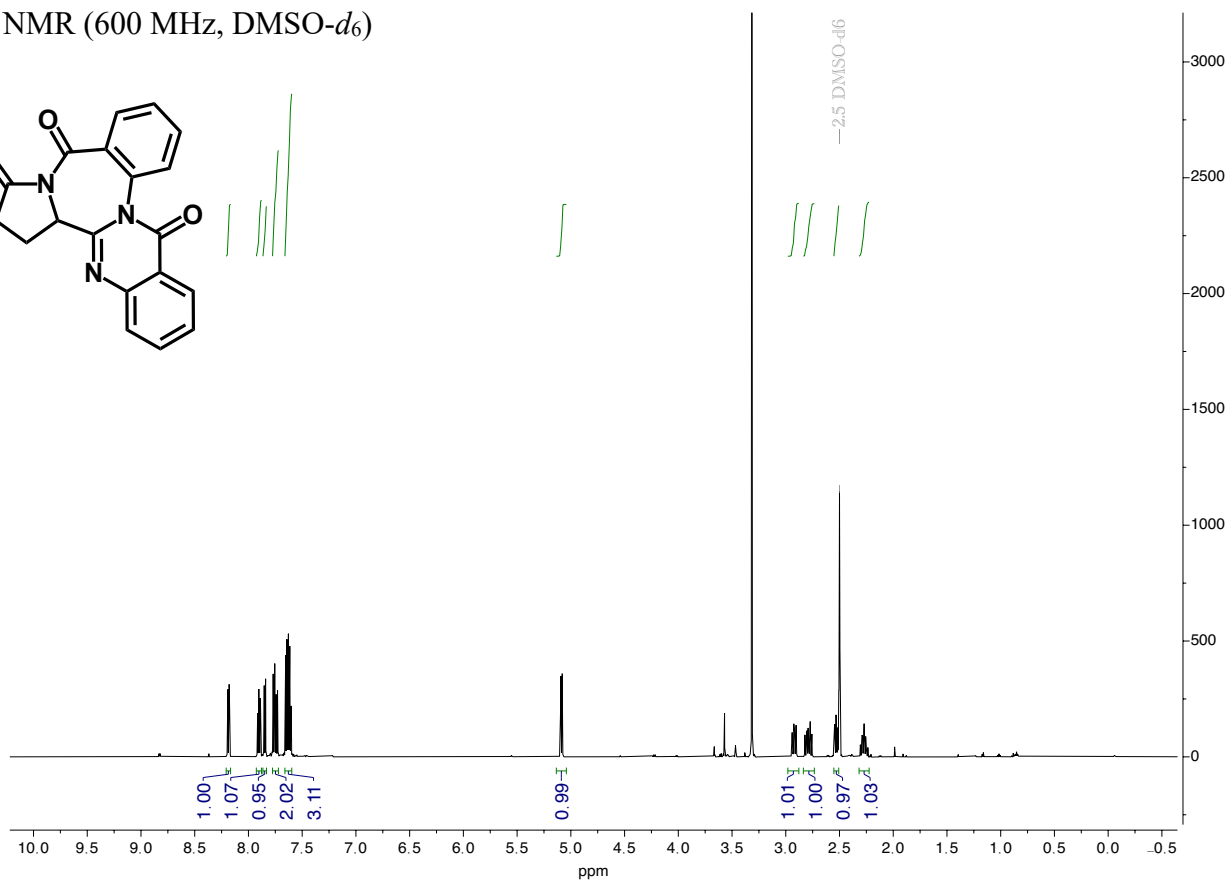

<sup>13</sup>C NMR (151 MHz, DMSO-*d*<sub>6</sub>)

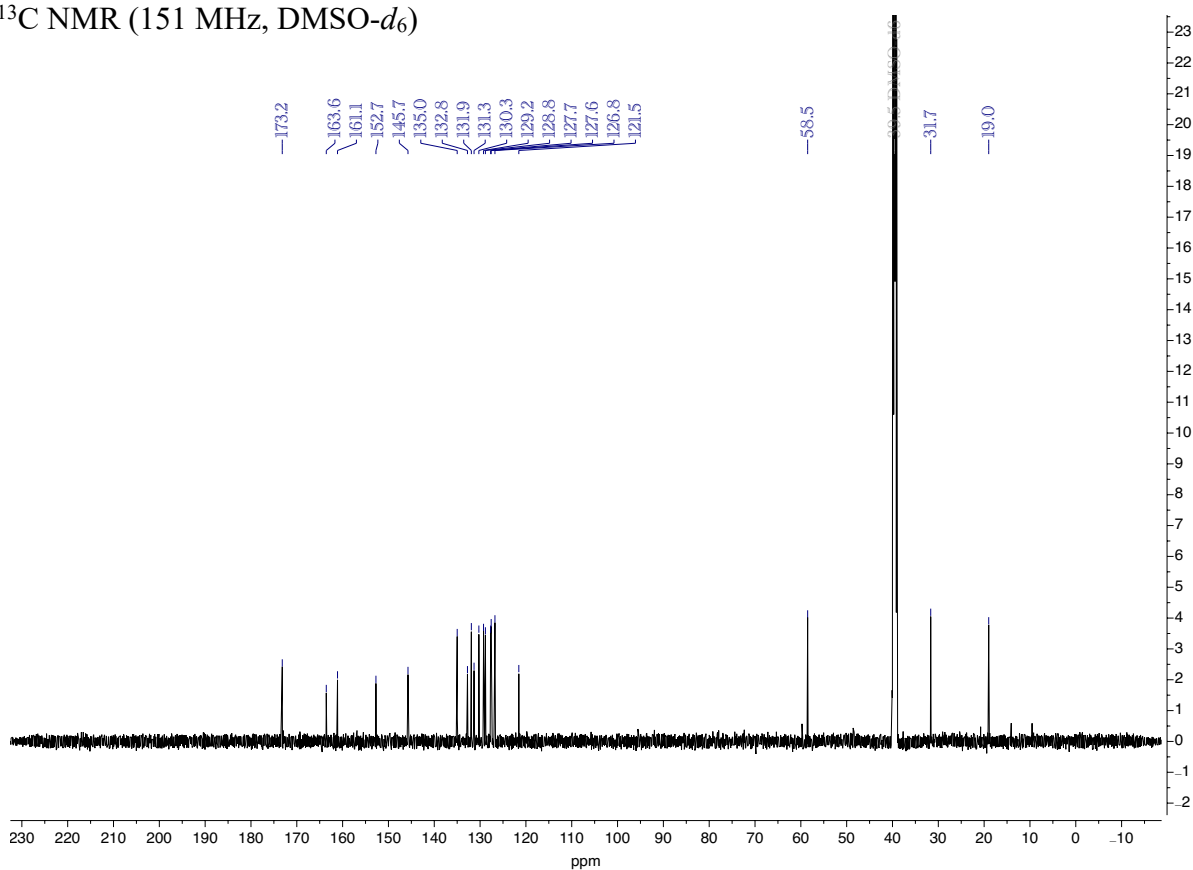

# (±)-Auranomide C (5)

<sup>1</sup>H NMR (600 MHz, DMSO-d<sub>6</sub>)

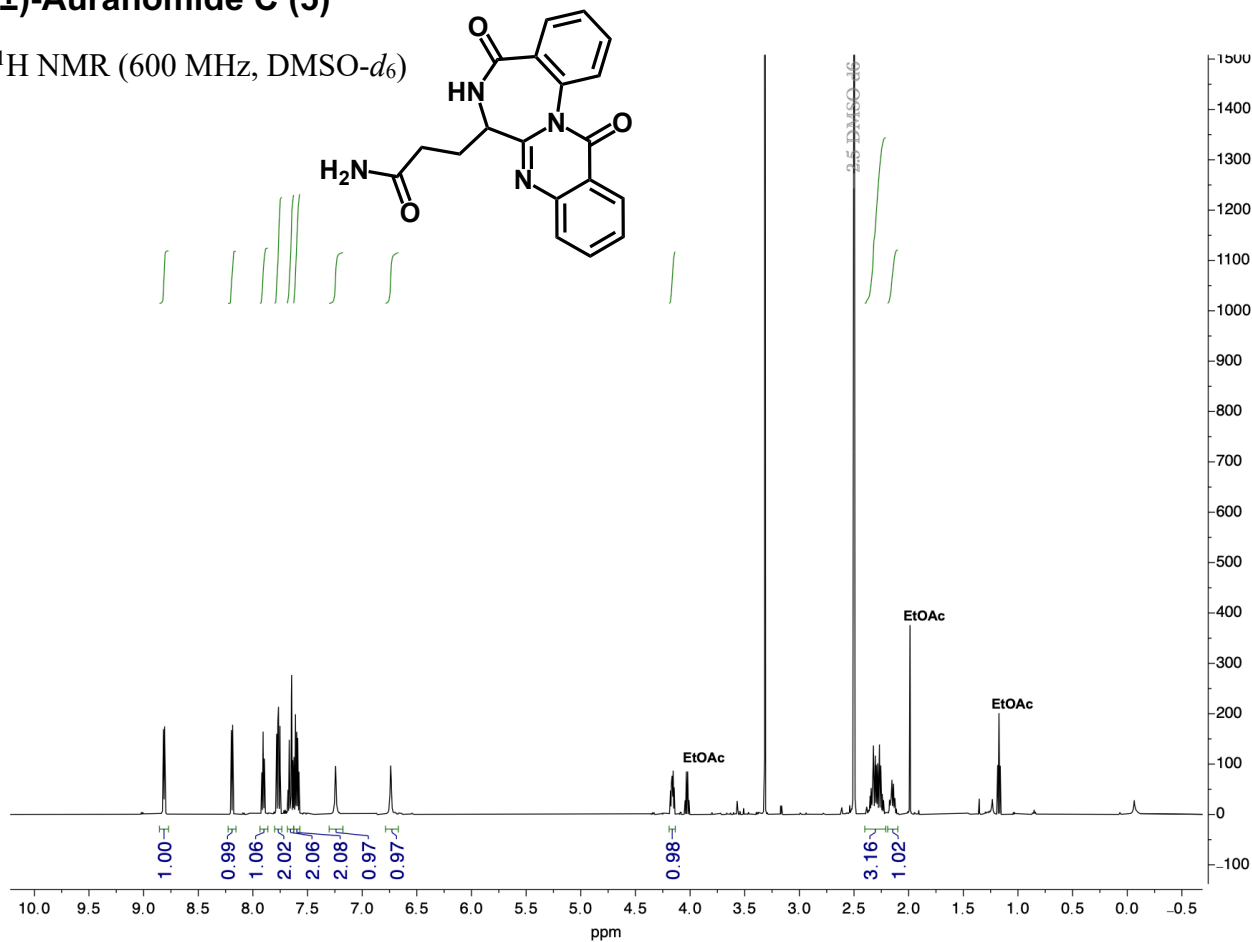

<sup>13</sup>C NMR (151 MHz, DMSO-d<sub>6</sub>)

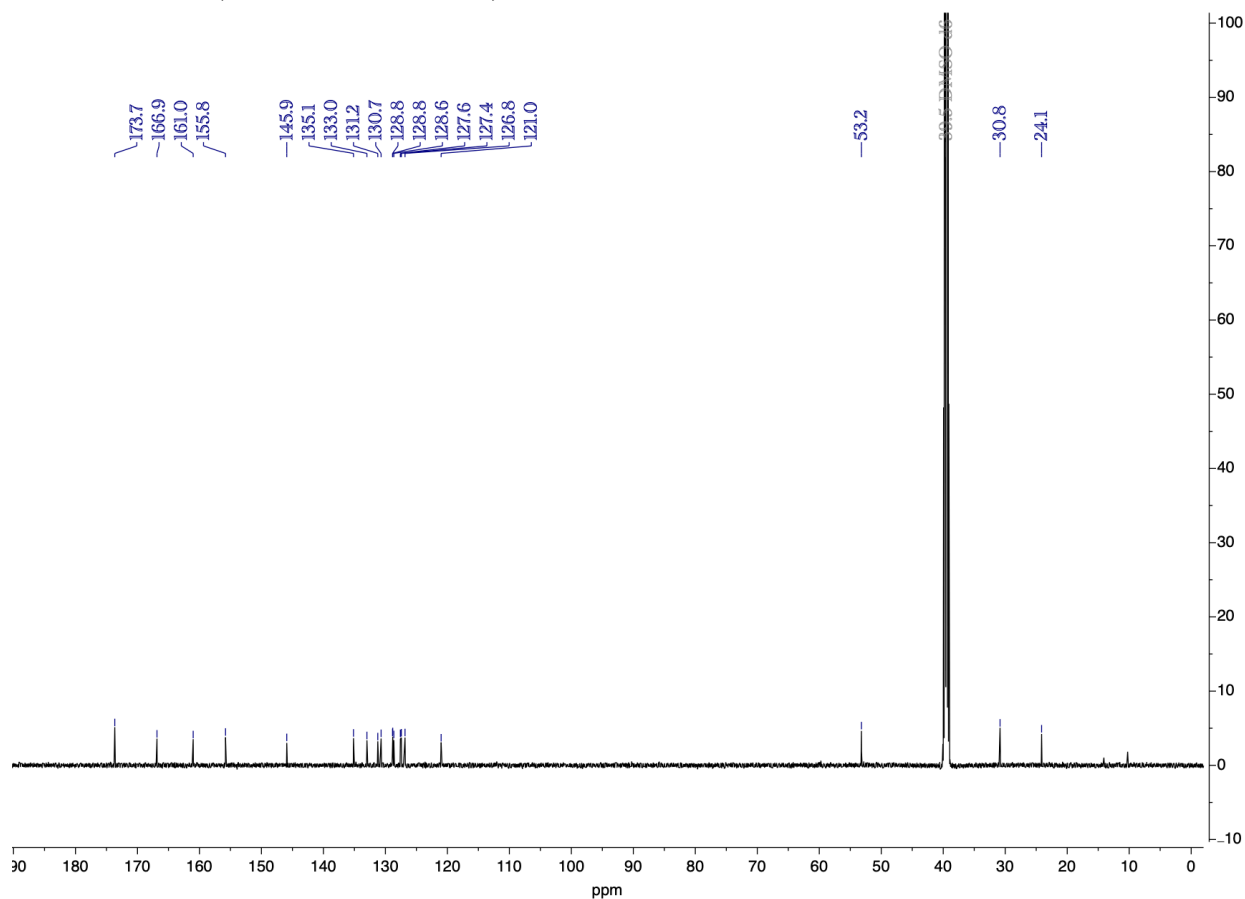

# (±)-Auranthine (1)

$^1\text{H}$  NMR (600 MHz,  $\text{DMSO-}d_6$ )

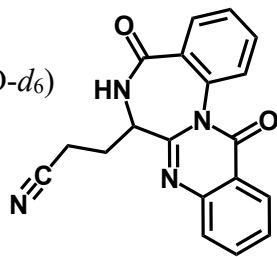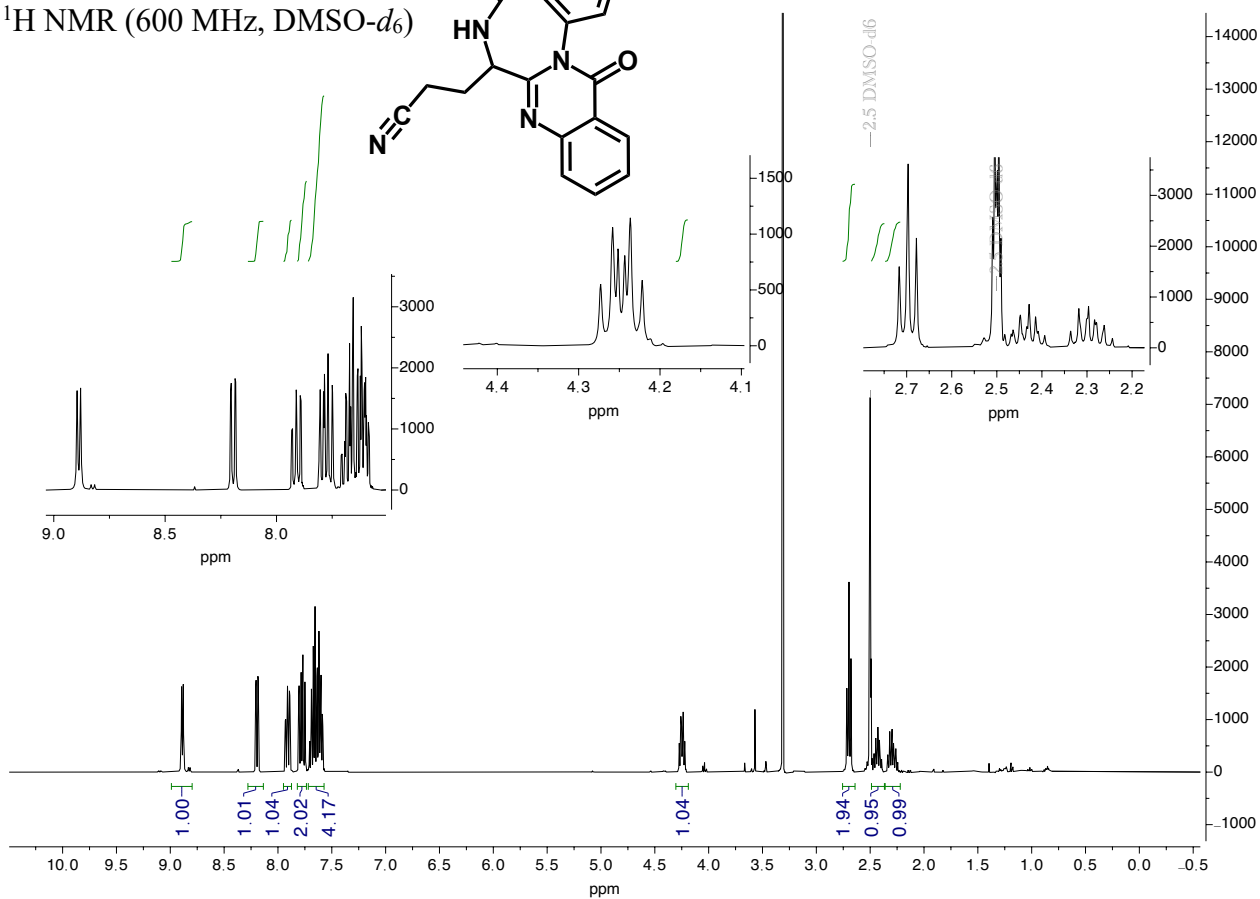

$^{13}\text{C}$  NMR (151 MHz,  $\text{DMSO-}d_6$ )

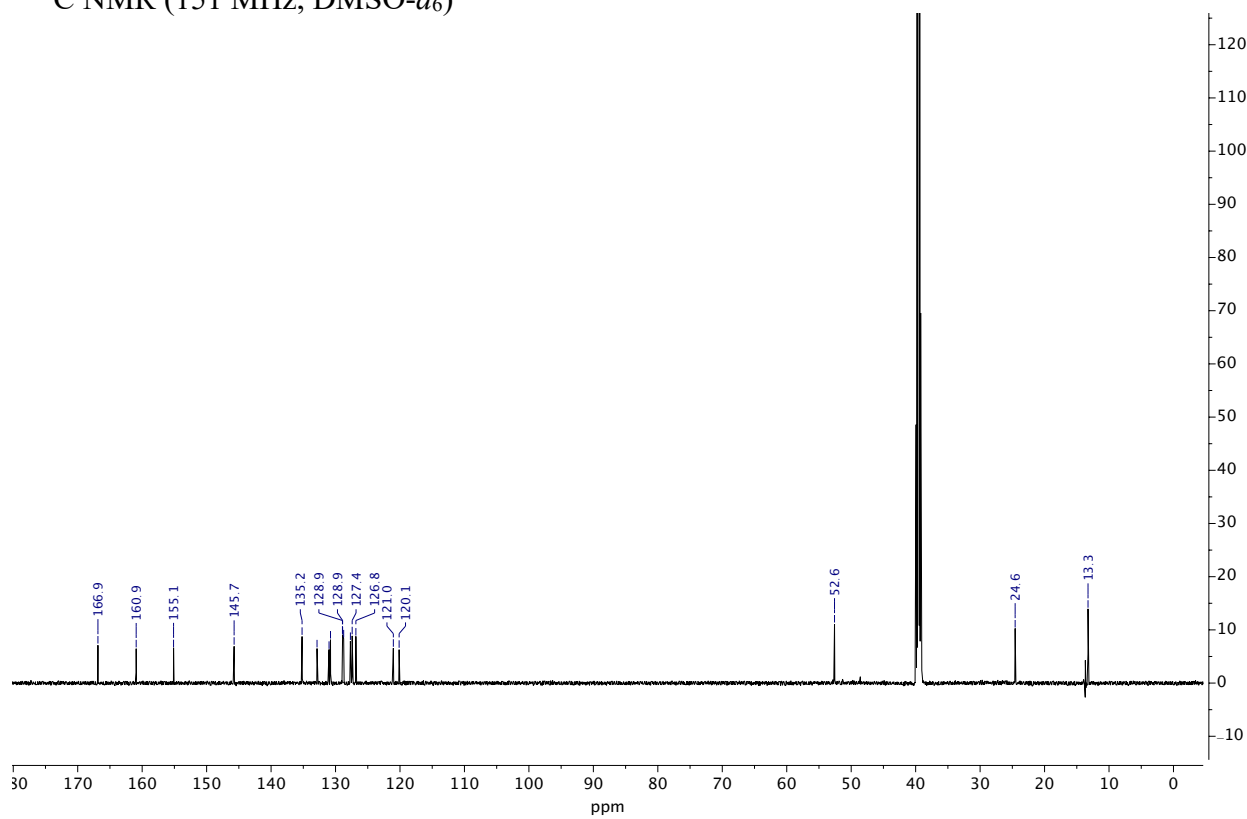

IR spectra comparison of synthetic ( $\pm$ )-Auranthine (1) and natural (-)-Auranthine (1)

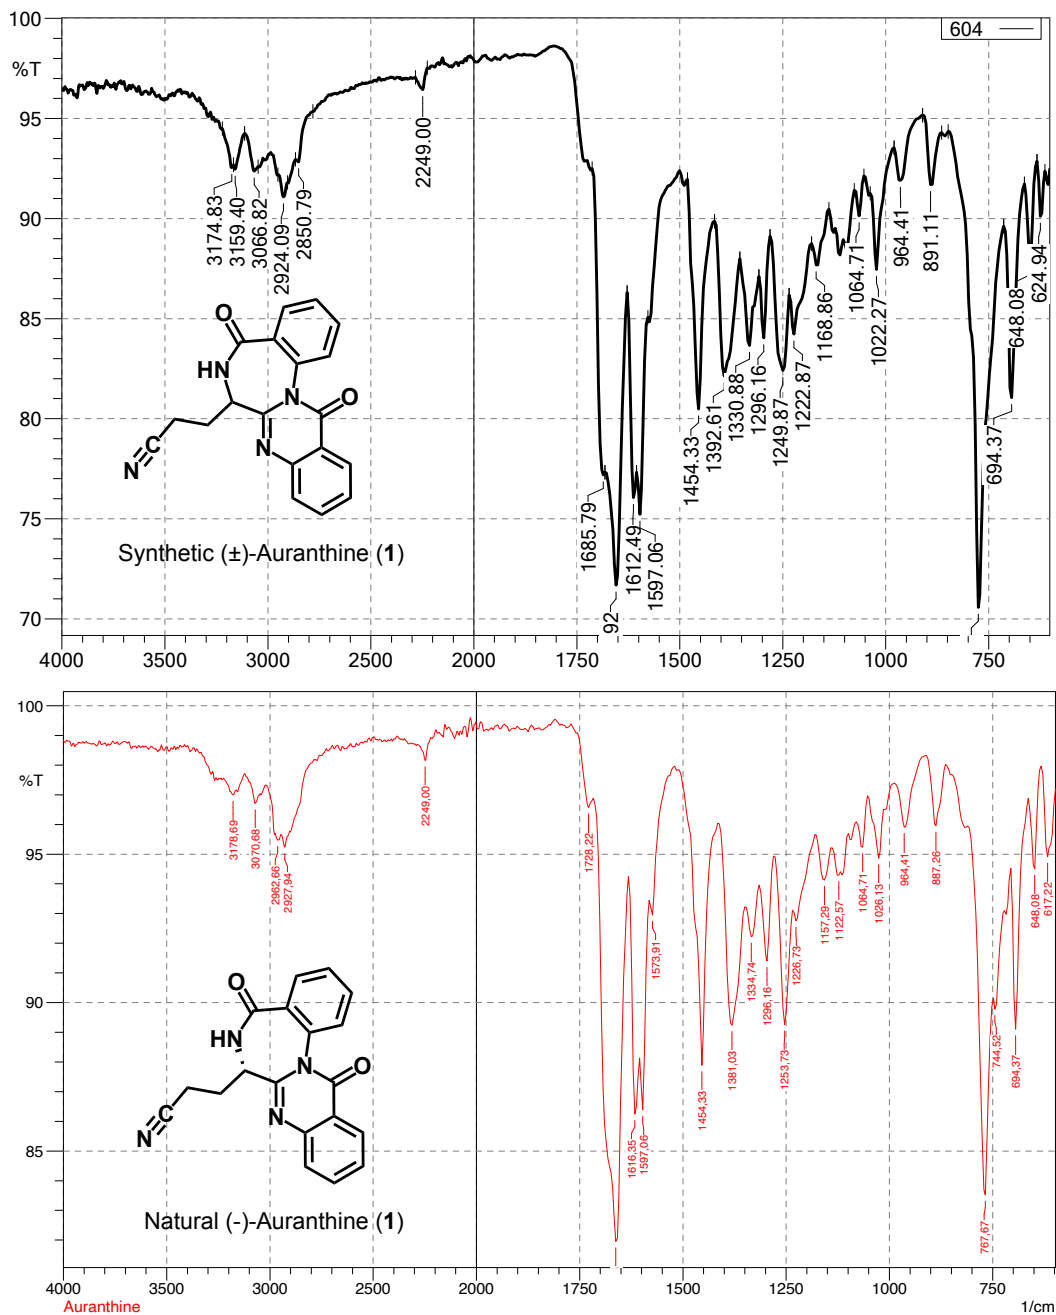

Supplement: d3ra07483h1.pdf [file d3ra07483h1.pdf]
